# Supplementary material
Source: Springer Nature journal article supplement (https://www.springermedizin.de/resource/supplementary/13044_2010_22_MOESM7_ESM.pdf/9659972)

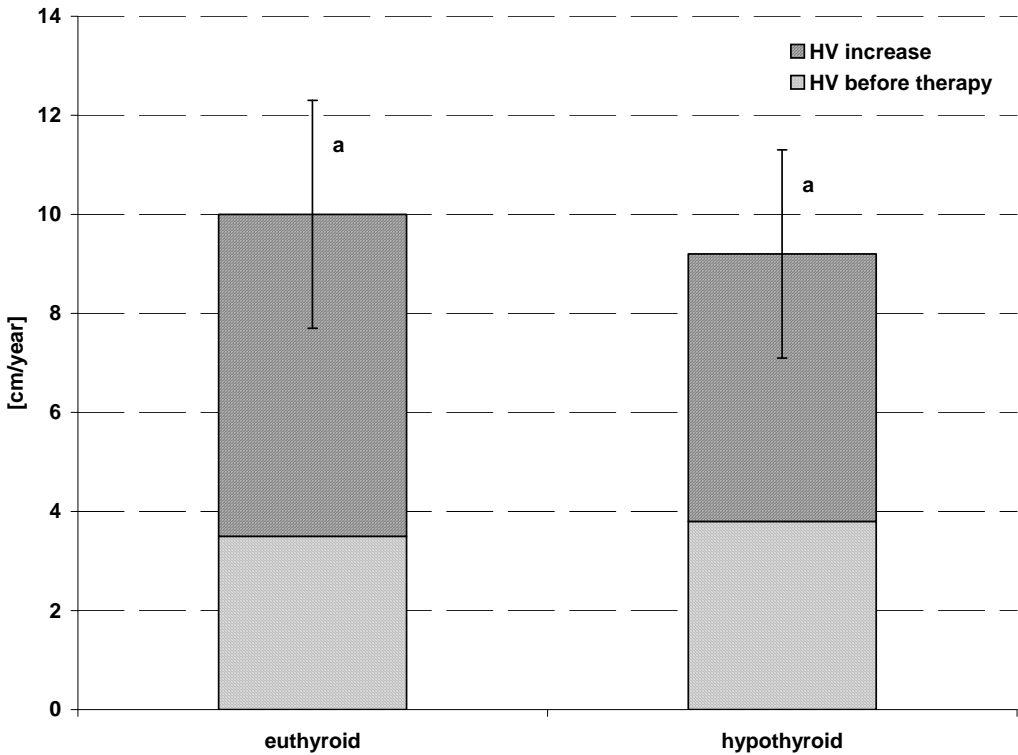

a - significant difference in HV increase ( $p < 0.05$ )

Supplement: MOESM7 [file 9659972]
